# Supplementary material
Source: Springer Nature journal article supplement (https://www.springermedizin.de/resource/supplementary/13023_2006_28_MOESM5_ESM.pdf/9641488)

# Survival with native liver

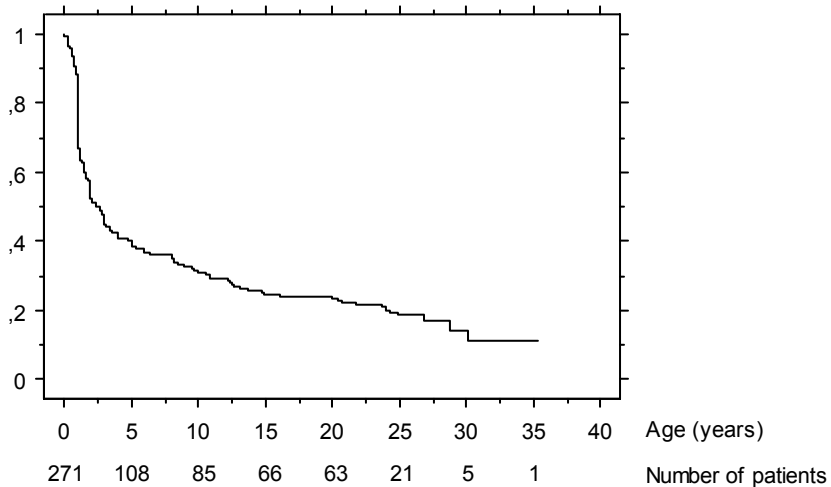

Supplement: MOESM5 [file 9641488]
